# Supplementary material for: A direct ab initio molecular dynamics (MD) study on the benzophenone–water 1 : 1 complex
Source: Royal Society of Chemistry journal article supplement (doi:10.1039/b905173b), 2009-01-01
Supplement: b905173b.pdf [file b905173b.pdf]

## SUPPORTING INFORMATION

A direct ab-initio molecular dynamics (MD) study on the  
Benzophenone-Water 1:1 complex

Hiroto TACHIKAWA,\* Tetsuji IYAMA and Kohich KATO

*Division of Materials Chemistry, Graduate School of Chemistry*

*Hokkaido University, Sapporo 060-8628, JAPAN*

---

**Table S1.** Optimized geometrical parameters of benzophenone (Bp). Bond lengths and angles are in Å and in degrees, respectively.

|                                    | B3LYP/6-31G(d) | B3LYP/6-311G(d,p) | B3LYP/6-311++G(d,p) |
|------------------------------------|----------------|-------------------|---------------------|
| r(C=O)                             | 1.2264         | 1.2192            | 1.2004              |
| r(C-C <sub>1</sub> )               | 1.5010         | 1.5016            | 1.5007              |
| r(C-C <sub>1</sub> ' )             | 1.5010         | 1.5016            | 1.5007              |
| r(C <sub>1</sub> -C <sub>2</sub> ) | 1.4035         | 1.4006            | 1.4008              |
| r(C <sub>2</sub> -C <sub>3</sub> ) | 1.3955         | 1.3930            | 1.3935              |
| r(C <sub>3</sub> -C <sub>4</sub> ) | 1.3956         | 1.3928            | 1.3935              |
| $\phi$                             | 50.1           | 52.1              | 54.2                |
| $\theta_1$                         | 120.7          | 120.3             | 120.1               |
| $\theta_2$                         | 119.7          | 119.8             | 120.0               |
| $\theta_3$                         | 119.7          | 119.8             | 120.0               |

**Table S2.** Optimized geometrical parameters of benzophenone H<sub>2</sub>O 1:1 complex Bp(H<sub>2</sub>O). Bond lengths and angles are in Å and in degrees, respectively.

| parameter                                                    | B3LYP/6-31G(d) | B3LYP/6-311G(d,p) | B3LYP/6-311++G(d,p) |
|--------------------------------------------------------------|----------------|-------------------|---------------------|
| r(C=O)                                                       | 1.2323         | 1.2252            | 1.2265              |
| r(C-C <sub>1</sub> )                                         | 1.4950         | 1.4959            | 1.4950              |
| r(C-C <sub>1</sub> ' )                                       | 1.4985         | 1.4990            | 1.4975              |
| r(C <sub>1</sub> -C <sub>2</sub> )                           | 1.4054         | 1.4024            | 1.4026              |
| r(C <sub>2</sub> -C <sub>3</sub> )                           | 1.3942         | 1.3918            | 1.3923              |
| r(C <sub>3</sub> -C <sub>4</sub> )                           | 1.3960         | 1.3932            | 1.3939              |
| $\phi$                                                       | 51.3           | 53.0              | 55.0                |
| $\theta_1$                                                   | 120.7          | 120.4             | 120.2               |
| $\theta_2$                                                   | 120.7          | 120.7             | 120.7               |
| $\theta_3$                                                   | 118.6          | 118.9             | 119.1               |
| r(O-O <sub>W</sub> )                                         | 2.8820         | 2.8869            | 2.8703              |
| r(O-H <sub>W1</sub> )                                        | 1.9532         | 1.9756            | 1.9157              |
| r(O <sub>W</sub> -H <sub>0</sub> )                           | 2.3531         | 2.3528            | 2.4711              |
| r(O <sub>W</sub> -H <sub>1</sub> )                           | 0.9759         | 0.9691            | 0.9714              |
| r(O <sub>W</sub> -H <sub>2</sub> )                           | 0.9690         | 0.9623            | 0.9611              |
| $\angle$ (C-O-O <sub>W</sub> )                               | 131.5          | 130.5             | 133.5               |
| $\angle$ (H <sub>W1</sub> -O <sub>W</sub> -H <sub>W2</sub> ) | 102.8          | 103.0             | 105.3               |

**Table S3.** Total energies of Bp, Bp(H<sub>2</sub>O) and H<sub>2</sub>O (in au), and solvation energy ( $\Delta E_{\text{solv}}$  in kcal/mol). Solvation energy corrected with the basis set superposition error (BSSE) is given in parenthesis (in kcal/mol).

| Method                 | Bp         | Bp(H <sub>2</sub> O) | H <sub>2</sub> O | $\Delta E_{\text{solv}}$ |
|------------------------|------------|----------------------|------------------|--------------------------|
| HF/3-21G(d)            | -569.78756 | -645.39423           | -75.58596        | 13.0                     |
| B3LYP/6-31G(d)         | -576.63227 | -653.05484           | -76.40895        | 8.5                      |
| B3LYP/6-311G(d,p)      | -576.77441 | -653.23565           | -76.44745        | 8.7                      |
| B3LYP/6-311++G(d,p)    | -576.78217 | -653.25048           | -76.45853        | 6.1 (5.5)                |
| PW91PW91/6-311++G(d,p) | -576.55589 | -652.9981393         | -76.4304982      | 7.4                      |

**Table S4.** Excitation energies (in eV) of Bp calculated at the B3LYP/6-311++G(d,p) level and experimental excitation energies.

| Assignment    | B3LYP/6-311++G(d,p) | Experiment              | INDO/CIS (Ref.25) |
|---------------|---------------------|-------------------------|-------------------|
| $n\pi^*$      | 3.60 (0.0013)       | 3.58 (weak)             | 3.15              |
| $\pi\pi^*(1)$ | 4.53 (0.0147)       | 4.46 (shoulder)         | 4.48              |
| $\pi\pi^*(2)$ | 4.61 (0.0438)       |                         | 4.50              |
| $\pi\pi^*(3)$ | 4.71 (0.2464)       | 5.01 (strong and broad) | 4.93              |
| $\pi\pi^*(4)$ | 4.87 (0.0383)       |                         | 5.04              |

**Table S5.** Excitation energies (in eV) of Bp and Bp(H<sub>2</sub>O), and energy shifts ( $\Delta E_{\text{shift}}$  in eV) caused by 1 : 1 complex formation

| Method                                             | Excitation    | Bp   | Bp(H <sub>2</sub> O) | $\Delta E_{\text{shift}}$ |
|----------------------------------------------------|---------------|------|----------------------|---------------------------|
| TD-B3LYP/6-311++G(d,p)// B3LYP/6-31G(d)            |               |      |                      |                           |
|                                                    | n $\pi^*$     | 3.55 | 3.66                 | +0.11                     |
|                                                    | $\pi\pi^*(1)$ | 4.48 | 4.34                 | -0.14                     |
|                                                    | $\pi\pi^*(2)$ | 4.55 | 4.43                 | -0.12                     |
|                                                    | $\pi\pi^*(3)$ | 4.64 | 4.53                 | -0.11                     |
| TD-PW91PW91/6-311++G(d,p)// PW91PW91/6-311++G(d,p) |               |      |                      |                           |
|                                                    | n $\pi^*$     | 3.12 | 3.25                 | +0.13                     |
|                                                    | $\pi\pi^*(1)$ | 3.91 | 3.36                 | -0.55                     |
|                                                    | $\pi\pi^*(2)$ | 3.98 | 3.88                 | -0.11                     |
|                                                    | $\pi\pi^*(3)$ | 4.05 | 3.88                 |                           |
| TD-B3LYP/6-311++G(d,p)// B3LYP/6-311++G(d,p)       |               |      |                      |                           |
|                                                    | n $\pi^*$     | 3.60 | 3.75                 | +0.15                     |
|                                                    | $\pi\pi^*(1)$ | 4.53 | 4.37                 | -0.16                     |
|                                                    | $\pi\pi^*(2)$ | 4.61 | 4.50                 | -0.11                     |
|                                                    | $\pi\pi^*(3)$ | 4.71 | 4.58                 | -0.13                     |
| Expl. <sup>a</sup>                                 | n $\pi^*$     | 3.58 | 3.85                 | +0.27                     |
|                                                    | $\pi\pi^*$    | 5.01 | 4.81                 | -0.20                     |

<sup>a</sup>Experimental values are cited from Reference 32. The excitation energies of Bp in bulk water.

**Table S6.** Mulliken atomic charges, bond populations, and dipole moments (in Debye) calculated by SE-CI/6-31G(d) calculations.

|                                 | $S_0$  | $n\pi^*(S_1)$ | $\pi\pi^*(S_2)$ | $\pi\pi^*(S_3)$ |
|---------------------------------|--------|---------------|-----------------|-----------------|
| <b>Bp</b>                       |        |               |                 |                 |
| charge                          |        |               |                 |                 |
| O                               | -0.557 | -0.298        | -0.600          | -0.588          |
| C                               | +0.538 | +0.264        | +0.496          | +0.520          |
| bond population                 |        |               |                 |                 |
| C=O                             | 0.581  | 0.318         | 0.557           | 0.570           |
| dipole moment                   |        |               |                 |                 |
| $\mu^a$                         | 3.41   | 1.52          | 3.95            | 3.88            |
| <b>Bp-H<sub>2</sub>O</b>        |        |               |                 |                 |
| charge                          |        |               |                 |                 |
| O                               | -0.606 | -0.351        | -0.653          | -0.642          |
| C                               | +0.565 | +0.286        | +0.511          | +0.535          |
| bond population                 |        |               |                 |                 |
| C=O                             | 0.541  | 0.301         | 0.509           | 0.522           |
| O--H <sub>w1</sub>              | 0.023  | 0.009         | 0.028           | 0.026           |
| H <sub>0</sub> --O <sub>w</sub> | 0.016  | 0.045         | 0.017           | 0.016           |

[a] Experimental values of dipole moment of Bp are 2.98 D for  $S_0$  state and 1.50 D for  $S_1$  state.

*Table S6.* Formation energies of water dimer ( $\Delta E_{\text{dimer}}$  in kcal/mol) calculated at the B3LYP/6-311++G(d,p)// B3LYP/6-31G(d) level.

| Method                 | H <sub>2</sub> O | (H <sub>2</sub> O) <sub>2</sub> | $\Delta E_{\text{dimer}}$ |
|------------------------|------------------|---------------------------------|---------------------------|
| B3LYP/6-311++G(d,p)    | -76.45853        | -152.9263403                    | 5.8                       |
| PW91PW91/6-311++G(d,p) | -76.4304982      | -152.8718132                    | 6.8                       |
|                        |                  |                                 |                           |

Co

*Table S7.* Excitation energies of BpH<sub>2</sub>O calculated at the B3LYP/6-311++G(d,p)// B3LYP/6-31G(d) level.

|                     | $n\pi^*$ | $\pi\pi^*(1)$ | $\pi\pi^*(2)$ | $\pi\pi^*(3)$ | $\pi\pi^*(4)$ |
|---------------------|----------|---------------|---------------|---------------|---------------|
| B3LYP/6-311++G(d,p) | 3.664    | 4.336         | 4.426         | 4.528         | 4.748         |
| //B3LYP/6-31G(d)    | 0.00131  | 0.0163        | 0.0453        | 0.2783        | 0.0502        |
